# Supplementary material for: Deregulation of Cholesterol Homeostasis by a Nuclear Hormone Receptor Crosstalk in Advanced Prostate Cancer
Source: MDPI journal article supplement (doi:10.3390/cancers14133110), 2022-06-24
Supplement: s1 [file s1]

# Supplementary Materials: Deregulation of Cholesterol Homeostasis by a Nuclear Hormone Receptor Crosstalk in Advanced Prostate Cancer

Nianxin Yang, Yatian Yang, Zenghong Huang and Hong-Wu Chen\*

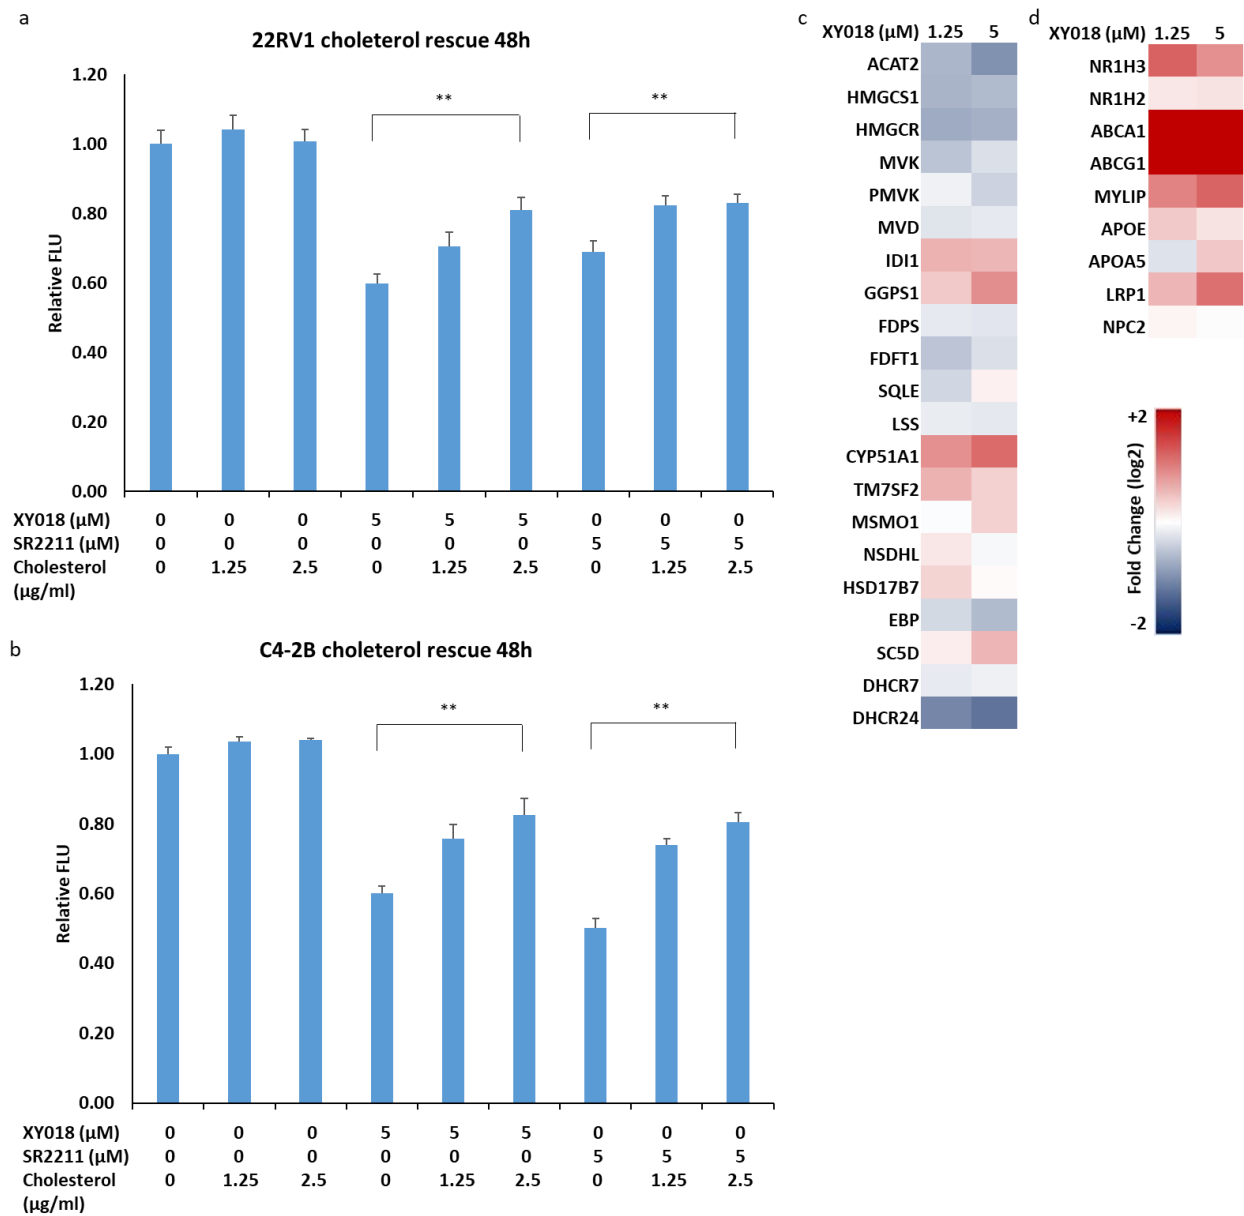

**Figure S1. (a and b).** Exogenous cholesterol rescued growth inhibition by ROR $\gamma$  antagonists in mCRPC cells. Cell viability was measured by CellTiter-Glo Assay of 22Rv1 (a) and C4-2B (b) cells treated with indicated concentration of XY018, SR2211, and cholesterol for 48 h. Data are shown as mean  $\pm$  s.d. n=3. Student's t test. \*p < 0.05, \*\*p < 0.01. **(c and d).** ROR $\gamma$  antagonist inhibit the expression of cholesterol biosynthesis genes and enhances the expression of cholesterol efflux genes in androgen-responsive LNCaP cells. Heat maps display mRNA expression of 21 cholesterol biosynthesis genes (c) or 7 cholesterol efflux genes (d) measured by qRT-PCR in LNCaP cells treated with indicated concentrations of XY018 for 48 h, as compared to vehicle (DMSO). n = 3.

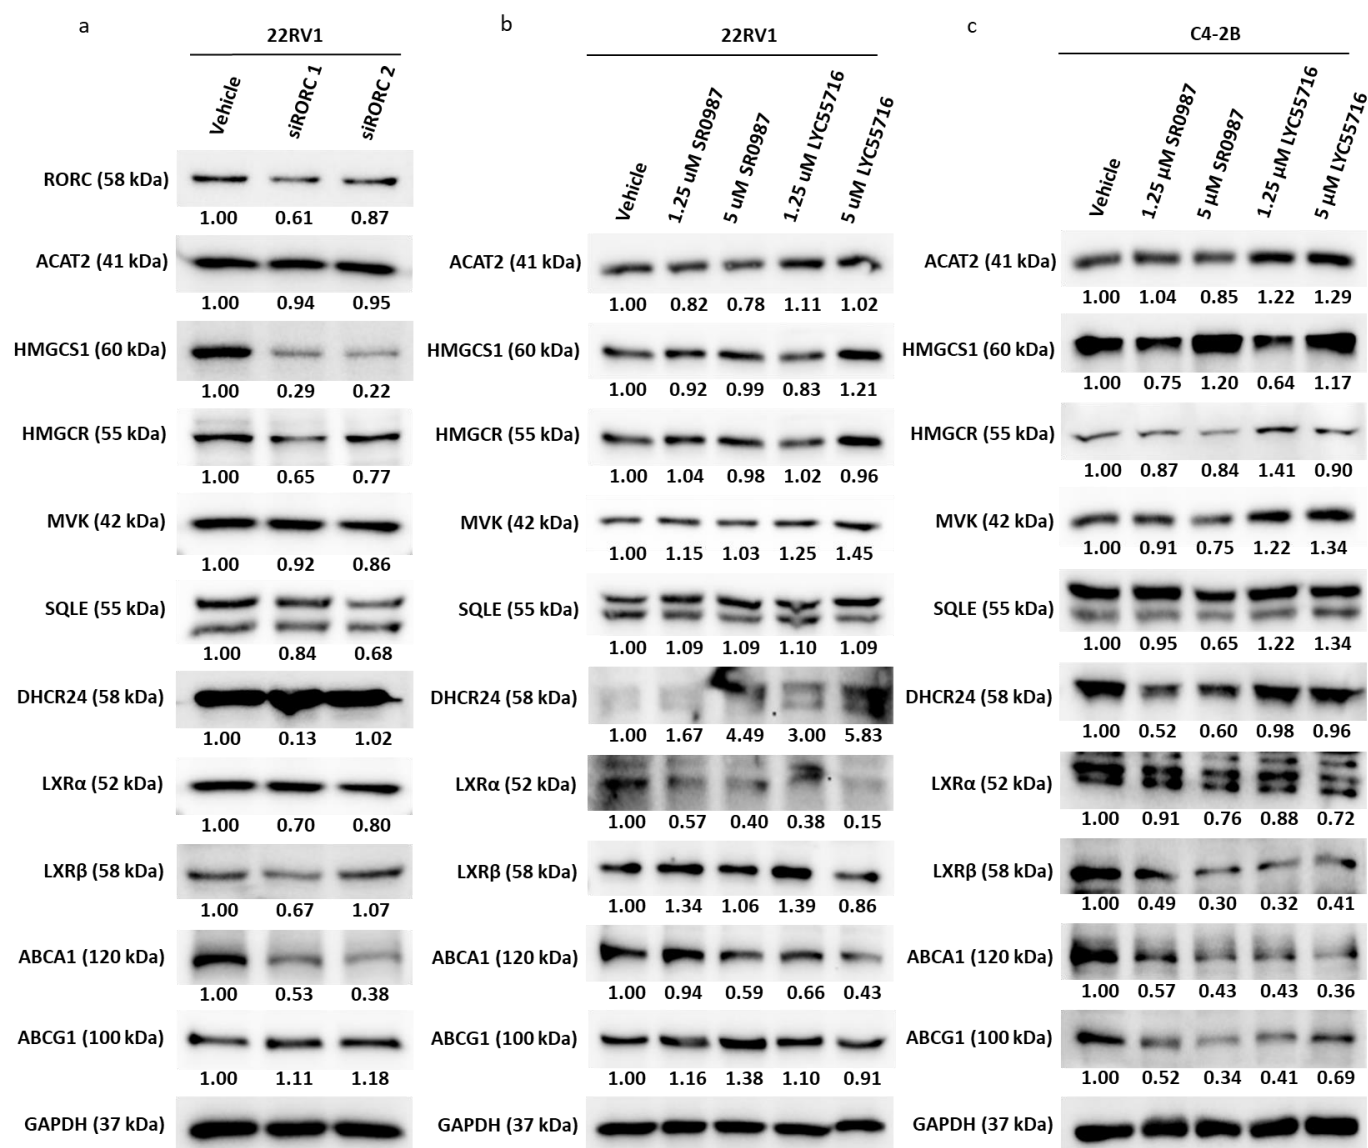

**Figure S2.** (a). Knockdown of ROR $\gamma$  inhibits the expression of key cholesterol biosynthesis proteins and enhances the expression of key cholesterol efflux proteins. Immunoblotting of ROR $\gamma$  and proteins involved in cholesterol biosynthesis and cholesterol efflux pathways in 22Rv1 cells treated with indicated siRNAs for 72 h. (b and c). ROR $\gamma$  agonist treatment show effects opposite to that of its antagonists on the protein expressions in mCRPC cells. Immunoblotting of proteins involved in cholesterol biosynthesis and cholesterol efflux pathways in 22Rv1 (b) and C4-2B (c) cells treated with indicated concentrations of SR0987 and LYC55716 for 72 h.

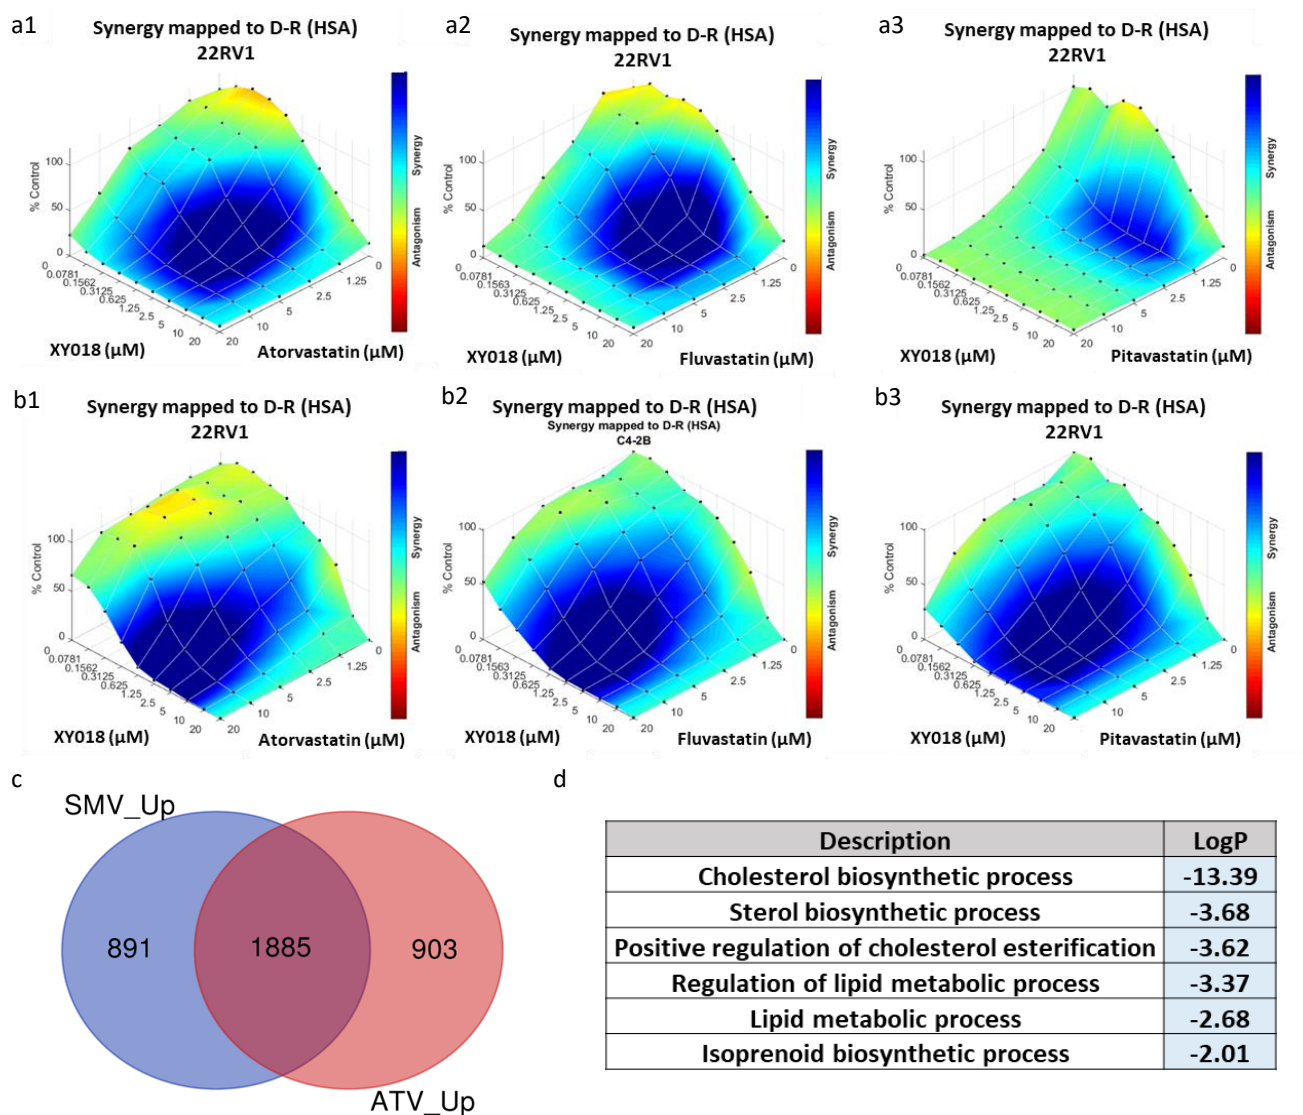

**Figure S3. (a and b).** ROR $\gamma$  antagonists possess synergism with statins in killing mCRPC cells. Drug combination synergism maps of 22Rv1 (**a 1-3**) and C4-2B (**b 1-3**) cells treated with XY018 and ATV, FLV, or PTV at indicated concentrations for 4 days. Blue indicates synergy while red indicates antagonism between drugs. (**c and d**). Statins induced feedback promotes cholesterol biosynthesis gene program expression. Venn diagram of the number of genes with expression significantly upregulated (1.4-fold) in 22Rv1 treated with SMV (5  $\mu$ M) and ATV (5  $\mu$ M) for 48 h, as detected by RNA-seq (**c**). Gene ontology analysis of the 1885 genes with expression upregulated by both SMV and ATV in 22Rv1 cells (**d**).

**Table S1.** Primers and their sequences used in qRT-PCR

| Cholesterol Biosynthesis | Sequence             | Cholesterol Efflux | Sequence                 |
|--------------------------|----------------------|--------------------|--------------------------|
| ACAT2_F                  | GCAGGTGTTCTTCAATGGT  | NR1H3_F            | CAGATCCGCCTGAAGAAACT     |
| ACAT2_R                  | CACAGCTTTTAGGCCTGACC | NR1H3_R            | TTAGCATCCGTGGGAACATC     |
| HMGCS1_F                 | AGCTCAGAGAGGACACCCAT | NR1H2_F            | ACAGCGGCTCAAGAACTAATG    |
| HMGCS1_R                 | GGTACTTTCTTGGCAGGGCT | NR1H2_R            | CGATCTCCTGGACTGAGATGAT   |
| HMGCR_F                  | CCCAGCCTACAAGTTGGAAA | ABCA1_F            | GGAGCTGTTACCGACAATAAG    |
| HMGCR_R                  | GCTCCCATCACCAAGGAGTA | ABCA1_R            | CCCACCAAGTCCCAAGATAATG   |
| MVK_F                    | GCTCAAGTCCCAGAGATCG  | ABCG1_F            | GGTGGTCTCGCTGATGAAA      |
| MVK_R                    | ATGGTGCTGGTTCATGTCAA | ABCG1_R            | AATCTGCTGGGTGTGGTAG      |
| PMVK_F                   | CGGAGAGTGCTGACATCCA  | MYLIP_F            | GTGGAGCCTCATCTCATCTTAC   |
| PMVK_R                   | AAGTTGTCCAGGCCACATTC | MYLIP_R            | GCACAGAGCTCCTCATAGTTATAC |
| MVD_F                    | AGGACAGCAACCAGTTCAC  | APOA5_F            | GAAAGGTGTGGGCTGTGATA     |
| MVD_R                    | GTGTCGTCCAGGGTGAAGAT | APOA5_R            | AAGTCTAGGCTTCAACTGGG     |
| IDI1_F                   | TGTTCCCTGCGAAAGGTATC | APOE_F             | TCACAGGCAGGAAGATGAAG     |
| IDI1_R                   | TGAACCTGTTGCTTGTGAG  | APOE_R             | AGCGCAGGTAATCCCAAA       |
| GGPS_F                   | ACACGGTGAAACCCTGTCTC | LRP1_F             | GATAGCCAACTCCCAGAACATC   |
| GGPS_R                   | AGAGGCACTATCTCGGCTCA | LRP1_R             | CTCATCCACGAAGCCCTTAG     |
| FDPS_F                   | AGGGCAATGTGGATCTTGTC | NPC2_F             | CCGAGCTTGGAAGTTCGTTAT    |
| FDPS_R                   | GAAAGAACTCCCCATCTCC  | NPC2_R             | GGTGACATTGACGCTGTAAGA    |
| FDFT1_F                  | GGTCCCGCTGTTACACAAC  |                    |                          |
| FDFT1_R                  | AAAACCTGCCCATCCCAATG |                    |                          |
| SQLE_F                   | GGCCATCTTTTGTGGAGAA  |                    |                          |
| SQLE_R                   | TTCAGAAGGGAATGGGAGTG |                    |                          |
| LSS_F                    | TTCCTGAGGCTCTCACAGGT |                    |                          |
| LSS_R                    | CCCTCCATCTGGATTCTCA  |                    |                          |
| CYP51A1_F                | GCTCAGTTGTTCCCTGCTTC |                    |                          |
| CYP51A1_R                | AAAATTAGCCAGGCATGGTG |                    |                          |
| TM7SF_F                  | CGCTTTCATCTTCAGCCTCT |                    |                          |
| TM7SF_R                  | GCTCTGCCTCCTTCATCAAC |                    |                          |
| MSMO1_F                  | ACTCTGTCTCCTTGGCTGGA |                    |                          |
| MSMO1_R                  | CATCGTGAAACCCCATCTCT |                    |                          |
| NSDHL_F                  | CTCAGCCAGTCACTCCTTCC |                    |                          |
| NSDHL_R                  | CTGCCTGCTTCAAGAAATCC |                    |                          |
| HSD17B7_F                | CGTAGGACTTCCGAAAGCAG |                    |                          |
| HSD17B7_R                | AGACAGCTTCTGCCTTGCTC |                    |                          |
| EBP_F                    | GCCTCAGCACCTAAGACTGG |                    |                          |
| EBP_R                    | ATGAACCCACACACTGCAAA |                    |                          |
| SC5D_F                   | TATCTCTTCCGCCATGTTC  |                    |                          |
| SC5D_R                   | TGGCTCATTCACCATTTCAA |                    |                          |
| DHCR7_F                  | CATTGACATCTGCCATGACC |                    |                          |
| DHCR7_R                  | ACAGGTCCTTCTGGTGGTTG |                    |                          |
| DHCR24_F                 | TGTTGCCTGAGCTTGATGAC |                    |                          |
| DHCR24_R                 | GACCAGGTACGGCATAGAA  |                    |                          |

**Table S2.** Antibodies used in immunoblotting

| Antibody     | Vendor                    | Catalog #  | Host Species |
|--------------|---------------------------|------------|--------------|
| ACAT2        | Abcam                     | ab131215   | Rabbit       |
| HMGCS1       | Santa Cruz Biotechnology  | sc-166763  | Mouse        |
| HMGCR        | Santa Cruz Biotechnology  | sc-271595  | Mouse        |
| MVK          | Proteintech               | 12228-1-AP | Rabbit       |
| SQLE         | Santa Cruz Biotechnology  | sc-271651  | Mouse        |
| DHCR24       | Santa Cruz Biotechnology  | sc-398938  | Mouse        |
| LXR $\alpha$ | Active Motif, Inc.        | 61175      | Rabbit       |
| LXR $\beta$  | Active Motif, Inc.        | 61177      | Rabbit       |
| ABCA1        | Santa Cruz Biotechnology  | sc-58219   | Mouse        |
| ABCG1        | Proteintech               | 13578-1-AP | Rabbit       |
| GAPDH        | Cell Signaling Technology | 14C10      | Rabbit       |
